# Supplementary material for: Use of electronic health records from a statewide health information exchange to support public health surveillance of diabetes and hypertension
Source: PubMed Central journal article supplement (PMC6694493; doi:10.1186/s12889-019-7367-z), 2019-08-14
Supplement: 12889_2019_7367_MOESM1_ESM.pdf [file 12889_2019_7367_MOESM1_ESM.pdf]

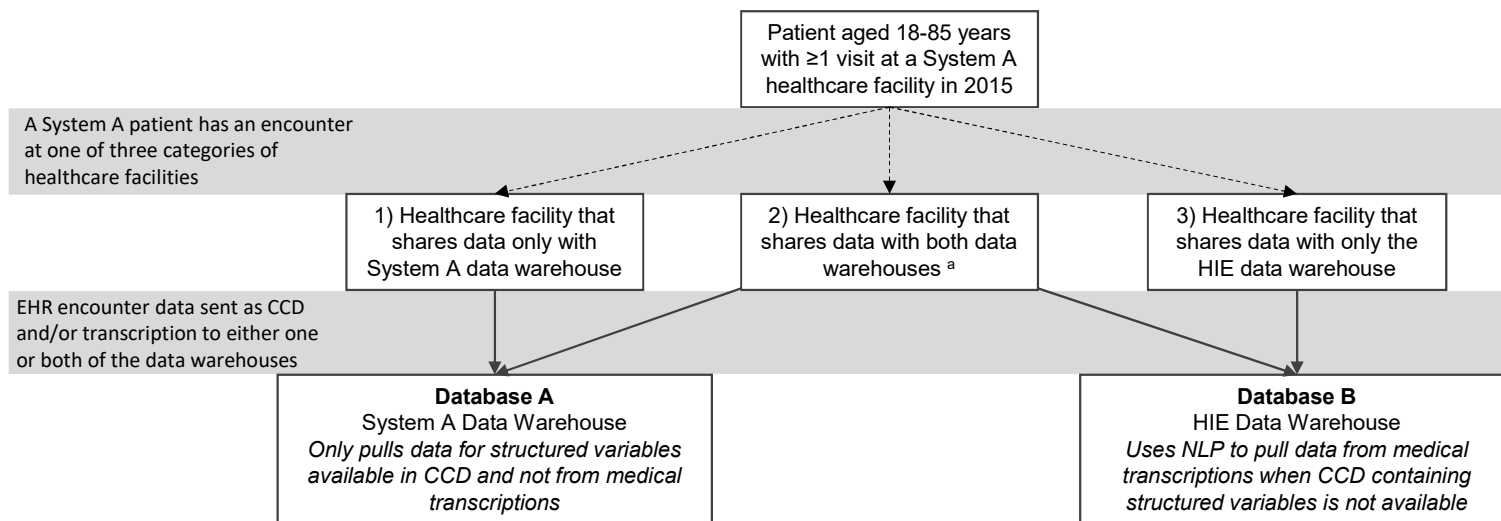

<sup>a</sup> All Healthcare System A facilities are under category 2, but each data warehouse receives data from System A patients from a variety of healthcare systems and healthcare facilities.

CCD: Continuity of care document, EHR: Electronic health record, HIE: Health information exchange, NLP: Natural language processing,
