# Supplementary material for: Use of electronic health records from a statewide health information exchange to support public health surveillance of diabetes and hypertension
Source: PubMed Central journal article supplement (PMC6694493; doi:10.1186/s12889-019-7367-z), 2019-08-14

### Diabetes Classification

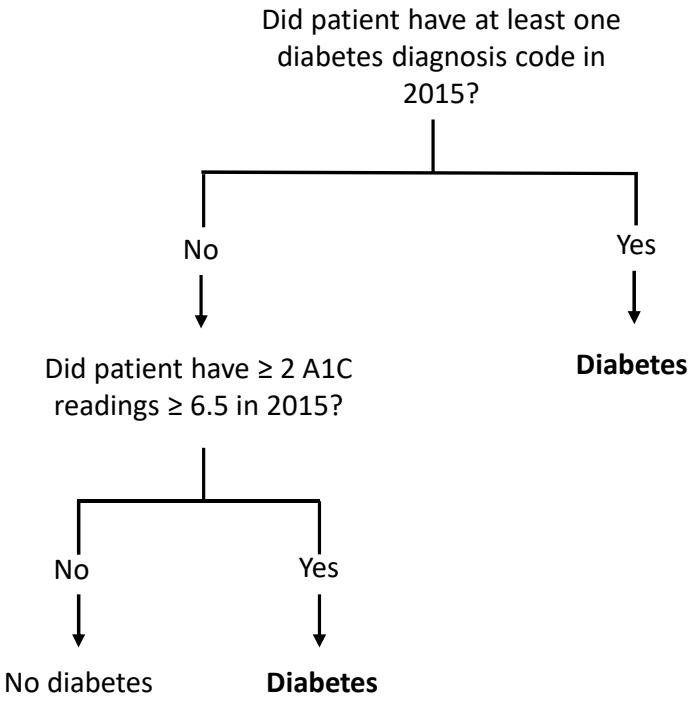

### Hypertension Classification

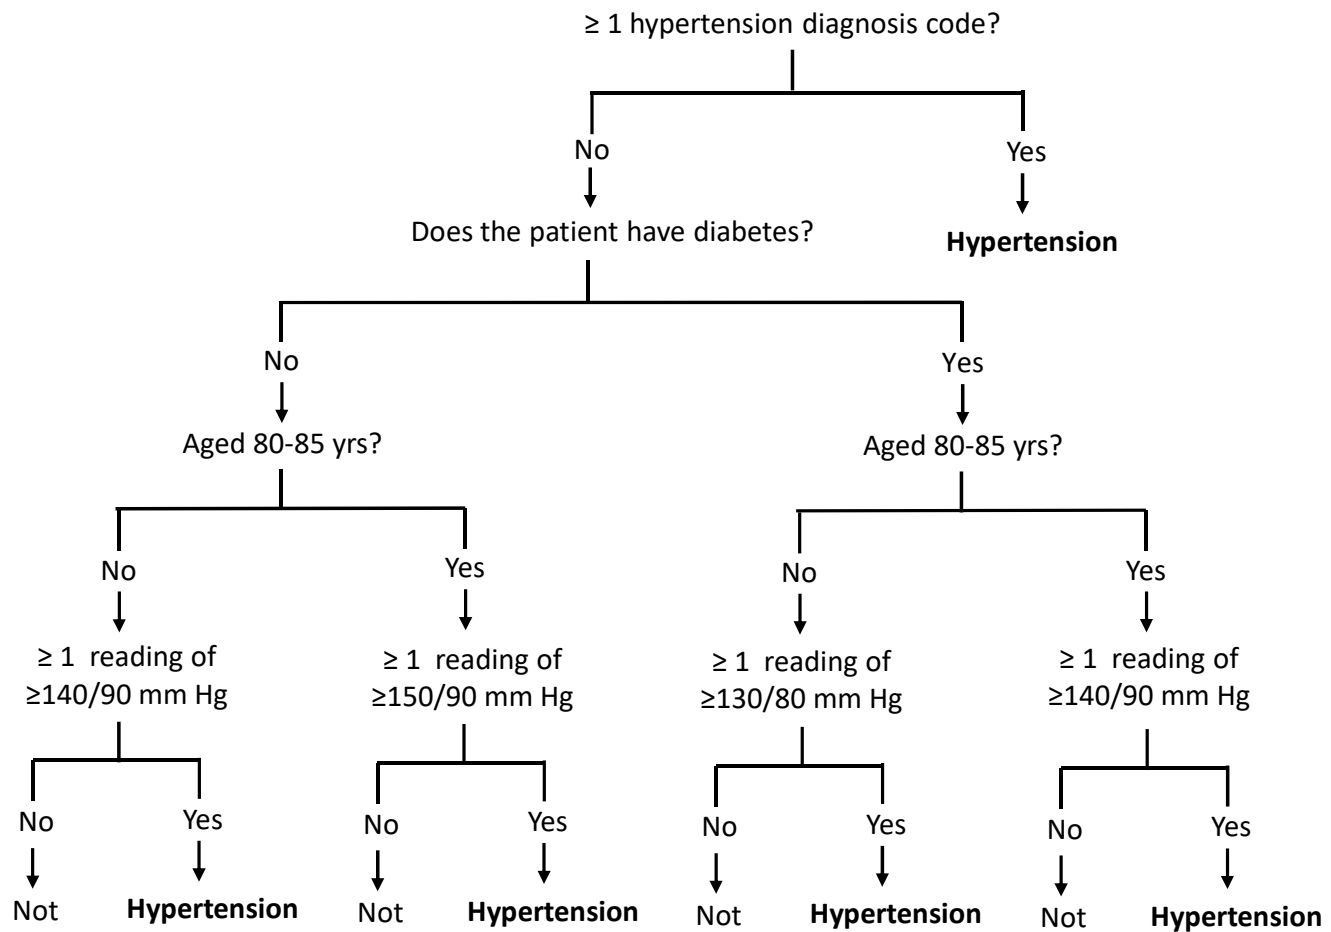

Supplement: 12889_2019_7367_MOESM2_ESM.pdf [file 12889_2019_7367_MOESM2_ESM.pdf]
